# Supplementary material
Source: PubMed Central journal article supplement (PMC6484357)
Supplement: Supp_Table1.pdf [file Supp_Table1.pdf]

## Supplementary Data

SUPPLEMENTARY TABLE S1. SUMMARY OF DEMOGRAPHICS AND CLINICAL INFORMATION OF THE TEMPORAL LOBE EPILEPSY PATIENTS

| <i>No.</i> | <i>Gender</i> | <i>Education (years)</i> | <i>Handedness</i> | <i>Age (years)</i> | <i>Seizure onset age</i> | <i>Seizure duration</i> | <i>Lateralization</i> | <i>AED count</i> |
|------------|---------------|--------------------------|-------------------|--------------------|--------------------------|-------------------------|-----------------------|------------------|
| 1          | Female        | 11                       | Right             | 32                 | 12                       | 20                      | Right                 | 3                |
| 2          | Male          | 16                       | Right             | 43                 | 37                       | 6                       | Left                  | 4                |
| 3          | Male          | 14                       | Right             | 41                 | 12                       | 29                      | Bilateral             | 2                |
| 4          | Female        | 11                       | Right             | 35                 | 34                       | 1                       | Left                  | 2                |
| 5          | Female        | 12                       | Right             | 36                 | 29                       | 7                       | Left                  | 2                |
| 6          | Male          | 16                       | Right             | 24                 | 24                       | 0                       | Left                  | 2                |
| 7          | Female        | 12                       | Right             | 51                 | 12                       | 39                      | Uncertain             | 2                |
| 8          | Male          | 16                       | Left              | 21                 | 20                       | 1                       | Right                 | 2                |
| 9          | Male          | 18                       | Right             | 38                 | 15                       | 23                      | Left                  | 2                |
| 10         | Female        | 14                       | Right             | 20                 | 11                       | 9                       | Right                 | 0                |
| 11         | Female        | 11                       | Right             | 45                 | 0.25                     | 45                      | Right                 | 2                |
| 12         | Male          | 12                       | Right             | 57                 | 25                       | 32                      | Left                  | 4                |
| 13         | Male          | 12                       | Right             | 36                 | 30                       | 6                       | Left                  | 3                |
| 14         | Female        | 19                       | Right             | 43                 | 41                       | 2                       | Left                  | 3                |
| 15         | Female        | 17                       | Right             | 42                 | 21                       | 21                      | Right                 | 3                |
| 16         | Female        | 16                       | Right             | 23                 | 16                       | 7                       | Right                 | 2                |
| 17         | Female        | 18                       | Right             | 47                 | 22                       | 25                      | Left                  | 4                |
| 18         | Female        | 12                       | Right             | 22                 | 21                       | 1                       | Right                 | 2                |
| 19         | Male          | 13                       | Right             | 21                 | 18                       | 3                       | Left                  | 2                |
| 20         | Male          | 11                       | Right             | 54                 | 10                       | 44                      | Uncertain             | 2                |
| 21         | Female        | 17                       | Right             | 45                 | 22                       | 23                      | Left                  | 2                |
| 22         | Male          | 12                       | Right             | 44                 | 43                       | 1                       | Right                 | 2                |
| 23         | Male          | 12                       | Right             | 54                 | 23                       | 31                      | Uncertain             | 2                |
| 24         | Female        | 12                       | Left              | 28                 | 6                        | 22                      | Right                 | 3                |
| 25         | Male          | 16                       | Left              | 55                 | 33                       | 22                      | Right                 | 1                |
| 26         | Male          | 12                       | Right             | 53                 | 47                       | 6                       | Uncertain             | 1                |
| 27         | Female        | 13                       | Right             | 55                 | 35                       | 20                      | Left                  | 2                |
| 28         | Female        | 18                       | Right             | 34                 | 13                       | 21                      | Uncertain             | 1                |
| 29         | Female        | 18                       | Right             | 44                 | 31                       | 13                      | Right                 | 1                |
| 30         | Female        | 16                       | Right             | 35                 | 11                       | 24                      | Left                  | 0                |
| 31         | Female        | 14                       | Right             | 40                 | 5                        | 35                      | Right                 | 2                |
| 32         | Female        | 16                       | Left              | 47                 | 1                        | 46                      | Uncertain             | 2                |
| 33         | Female        | 18                       | Right             | 36                 | 28                       | 8                       | Left                  | 1                |
| 34         | Male          | 16                       | Right             | 54                 | 53                       | 1                       | Uncertain             | 1                |
| 35         | Female        | 12                       | Right             | 24                 | 7                        | 17                      | Right                 | 3                |
| 36         | Male          | 14                       | Right             | 52                 | 3                        | 49                      | Uncertain             | 3                |
| 37         | Female        | 13                       | Right             | 35                 | 13                       | 22                      | Left                  | 1                |
| 38         | Female        | 12                       | Right             | 46                 | 5                        | 41                      | Uncertain             | 1                |
| 39         | Female        | 16                       | Right             | 38                 | 16                       | 22                      | Left                  | 1                |
| 40         | Female        | 16                       | Right             | 57                 | 17                       | 40                      | Left                  | 1                |
| 41         | Female        | 21                       | Right             | 38                 | 5                        | 33                      | Left                  | 1                |
| 42         | Female        | 17                       | Right             | 31                 | 5                        | 26                      | Right                 | 4                |
| 43         | Male          | 12                       | Right             | 24                 | 20                       | 4                       | Uncertain             | 0                |
| 44         | Female        | 14                       | Right             | 19                 | 13                       | 6                       | Left                  | 1                |
| 45         | Male          | 16                       | Right             | 52                 | 24                       | 28                      | Left                  | 2                |
| 46         | Female        | 18                       | Right             | 36                 | 30                       | 6                       | Left                  | 3                |
| 47         | Male          | 16                       | Right             | 56                 | 47                       | 9                       | Uncertain             | 2                |
| 48         | Female        | 16                       | Right             | 35                 | 5                        | 30                      | Uncertain             | 3                |
| 49         | Male          | 8                        | Right             | 57                 | 8                        | 49                      | Right                 | 3                |
| 50         | Male          | 12                       | Right             | 21                 | 12                       | 9                       | Bilateral             | 1                |
| 51         | Male          | 14                       | Right             | 37                 | 24                       | 13                      | Left                  | 2                |
| 52         | Male          | 12                       | Right             | 26                 | 23                       | 3                       | Left                  | 2                |
| 53         | Female        | 22                       | Right             | 59                 | 22                       | 37                      | Left                  | 2                |

(continued)

SUPPLEMENTARY TABLE S1. (CONTINUED)

| <i>No.</i> | <i>Gender</i> | <i>Education (years)</i> | <i>Handedness</i> | <i>Age (years)</i> | <i>Seizure onset age</i> | <i>Seizure duration</i> | <i>Lateralization</i> | <i>AED count</i> |
|------------|---------------|--------------------------|-------------------|--------------------|--------------------------|-------------------------|-----------------------|------------------|
| 54         | Female        | 14                       | Right             | 38                 | 34                       | 4                       | Left                  | 1                |
| 55         | Female        | 18                       | Left              | 48                 | 44                       | 4                       | Left                  | 2                |
| 56         | Male          | 13                       | Right             | 19                 | 16                       | 3                       | Uncertain             | 1                |
| 57         | Male          | 16                       | Right             | 43                 | 29                       | 14                      | Left                  | 1                |
| 58         | Male          | 13                       | Right             | 19                 | 12                       | 7                       | Left                  | 0                |
| 59         | Female        | 20                       | Right             | 53                 | 49                       | 4                       | Bilateral             | 2                |
| 60         | Female        | 14                       | Right             | 52                 | 36                       | 16                      | Right                 | 1                |
| 61         | Female        | 18                       | Right             | 48                 | 19                       | 29                      | Left                  | 4                |
| 62         | Male          | 16                       | Right             | 52                 | 2                        | 50                      | Left                  | 3                |
| 63         | Male          | 12                       | Right             | 23                 | 19                       | 4                       | Right                 | 3                |
| 64         | Female        | 16                       | Right             | 36                 | 17                       | 19                      | Right                 | 2                |
| 65         | Male          | 16                       | Right             | 59                 | 52                       | 7                       | Uncertain             | 1                |
| 66         | Female        | 15                       | Right             | 25                 | 24                       | 1                       | Left                  | 1                |
| 67         | Female        | 12                       | Right             | 60                 | 2                        | 58                      | Left                  | 3                |
| 68         | Female        | 9                        | Right             | 39                 | 25                       | 14                      | Left                  | 3                |
| 69         | Male          | 16                       | Right             | 56                 | 27                       | 29                      | Left                  | 1                |

Grayed out subjects were motion outliers and excluded from the analysis. Our temporal lobe epilepsy patient group was highly heterogeneous.

AED, anti-epileptic drug.
